# Supplementary material for: Long runs of homozygosity are associated with Alzheimer’s disease
Source: PubMed Central journal article supplement (PMC7904832; doi:10.1038/s41398-020-01145-1), 2021-02-24

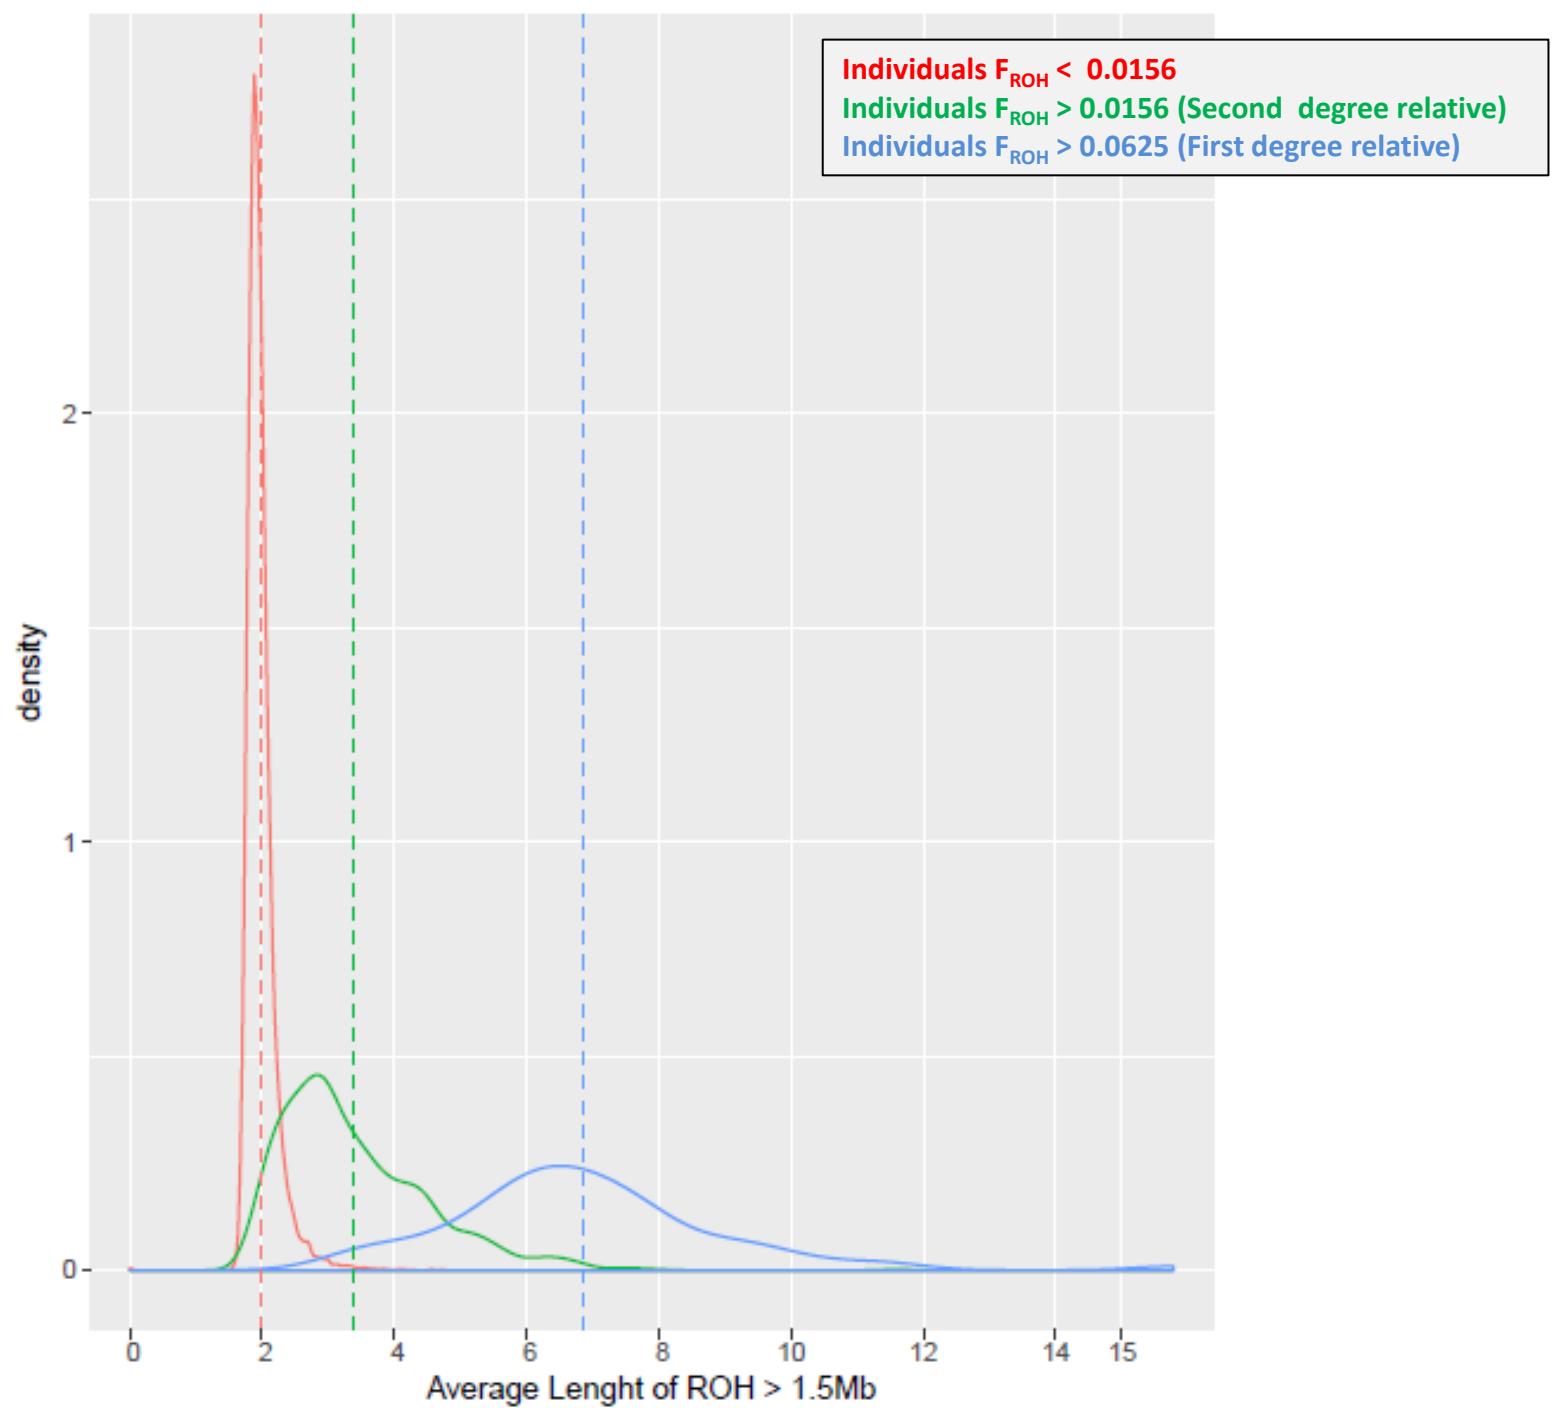

Supplement: 41398_2020_1145_MOESM8_ESM.pdf [file 41398_2020_1145_MOESM8_ESM.pdf]
